# Supplementary material
Source: ML conference proceedings conference paper supplement (https://proceedings.neurips.cc/paper_files/paper/2023/hash/12da92b7c64176eb6eb6ad0ae31554fd-Abstract.html)
Supplement: Supplementary file 1 [file 12da92b7c64176eb6eb6ad0ae31554fd-Supplemental-Conference.zip]

Archive with 1 entries (1 files):
- Graph_of_Circuits_with_GNN_for_Exploring_Optimal_Design_Space___Supplementary_finalcopy.pdf
